# Supplementary material for: Formation of carbon nanodots with different spin states in mechanically processed mixtures of ZnO with carbon nanoparticles: an electron paramagnetic resonance study
Source: Royal Society of Chemistry journal article supplement (doi:10.1039/c6cp07685h), 2017-01-01
Supplement: c6cp07685h1.pdf [file c6cp07685h1.pdf]

## Electronic supporting information

# Formation of carbon nanodots with different spin states in mechanically processed mixtures of ZnO with carbon nanoparticles: an electron paramagnetic resonance study

**M. Kakazey,<sup>1,a)</sup> M. Vlasova,<sup>1</sup> V. Gómez-Vidales,<sup>2</sup> A. Ángeles-Pascual,<sup>3</sup> and V. A. Basiuk<sup>4</sup>**

<sup>1</sup>*Centro de Investigación en Ingeniería y Ciencias Aplicadas, Universidad Autónoma del Estado de Morelos, 62210 Cuernavaca, Morelos, Mexico;*

<sup>2</sup>*Instituto de Química, Universidad Nacional Autónoma de México, Circuito Exterior C.U., 04510 Cd. México, Mexico;*

<sup>3</sup>*Sección de Electrónica del Estado Sólido, Departamento de Ingeniería Eléctrica, Centro de Investigación y de Estudios Avanzados del Instituto Politécnico Nacional, Zacatenco, 07360 Cd. México, Mexico;*

<sup>4</sup>*Instituto de Ciencias Nucleares, Universidad Nacional Autónoma de México, Circuito Exterior C.U., 04510 Cd. México, Mexico*

---

<sup>a)</sup>Authors to whom correspondence should be addressed. Electronic addresses: kakazey@hotmail.com

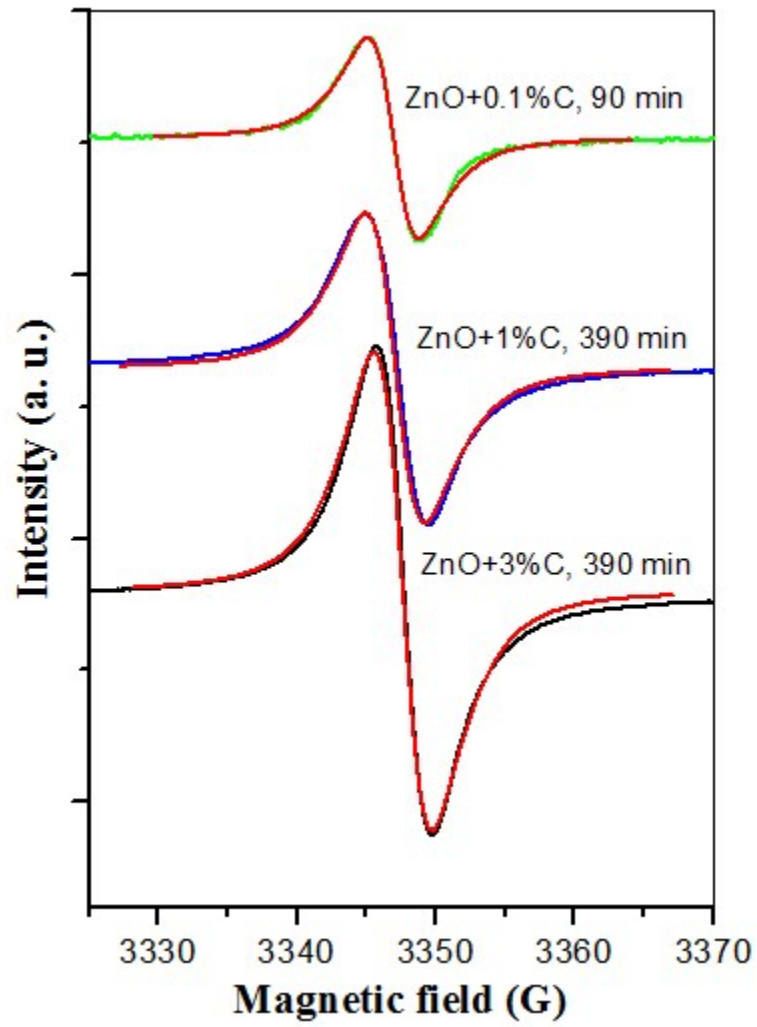

FIG. S1. Comparison of the shapes of experimental C EPR signals (black line,  $P = 0.5$  mW) for  $\text{ZnO}+x\text{C}$  samples with a Lorentzian lineshape (red line) having the same width and amplitude.

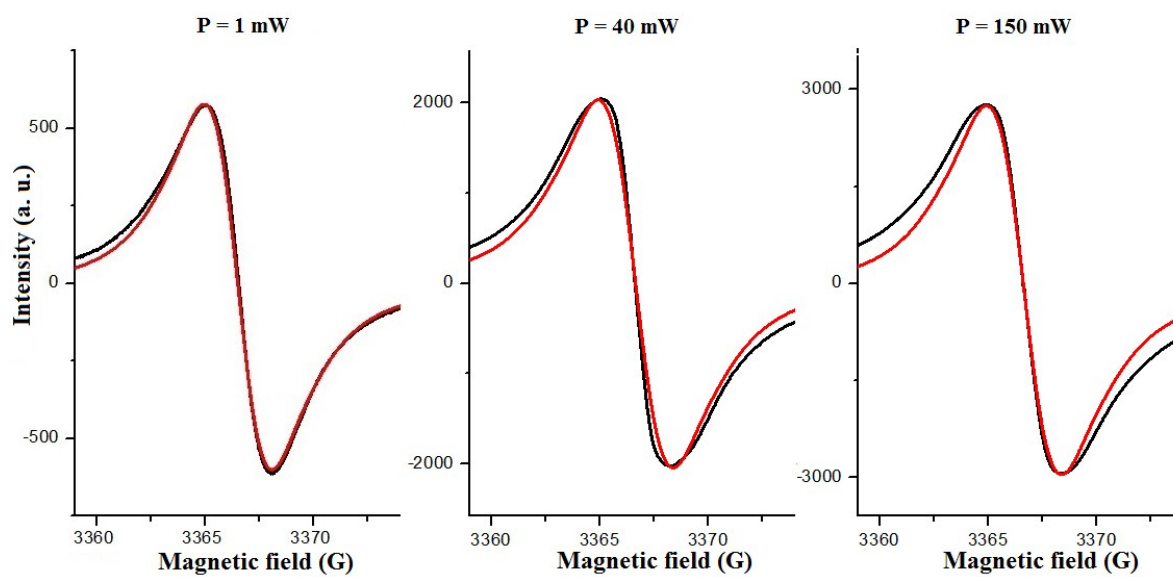

FIG. S2. Comparison of the shapes of experimental C EPR signals (black lines) recorded at different microwave power for ZnO+3% C sample with a Lorentzian lineshape (red lines) having the same width and amplitude.
